# Supplementary material for: Reversible ubiquitination shapes NLRC5 function and modulates NF-κB activation switch
Source: PubMed Central journal article supplement — J Cell Biol. 2015 Dec 7;211(5):1025–40. doi: 10.1083/jcb.201505091 (PMC4674279; doi:10.1083/jcb.201505091), 2015-12-07
Supplement: supp_jcb.201505091_JCB_201505091_sm.pdf [file supp_jcb.201505091_JCB_201505091_sm.pdf]

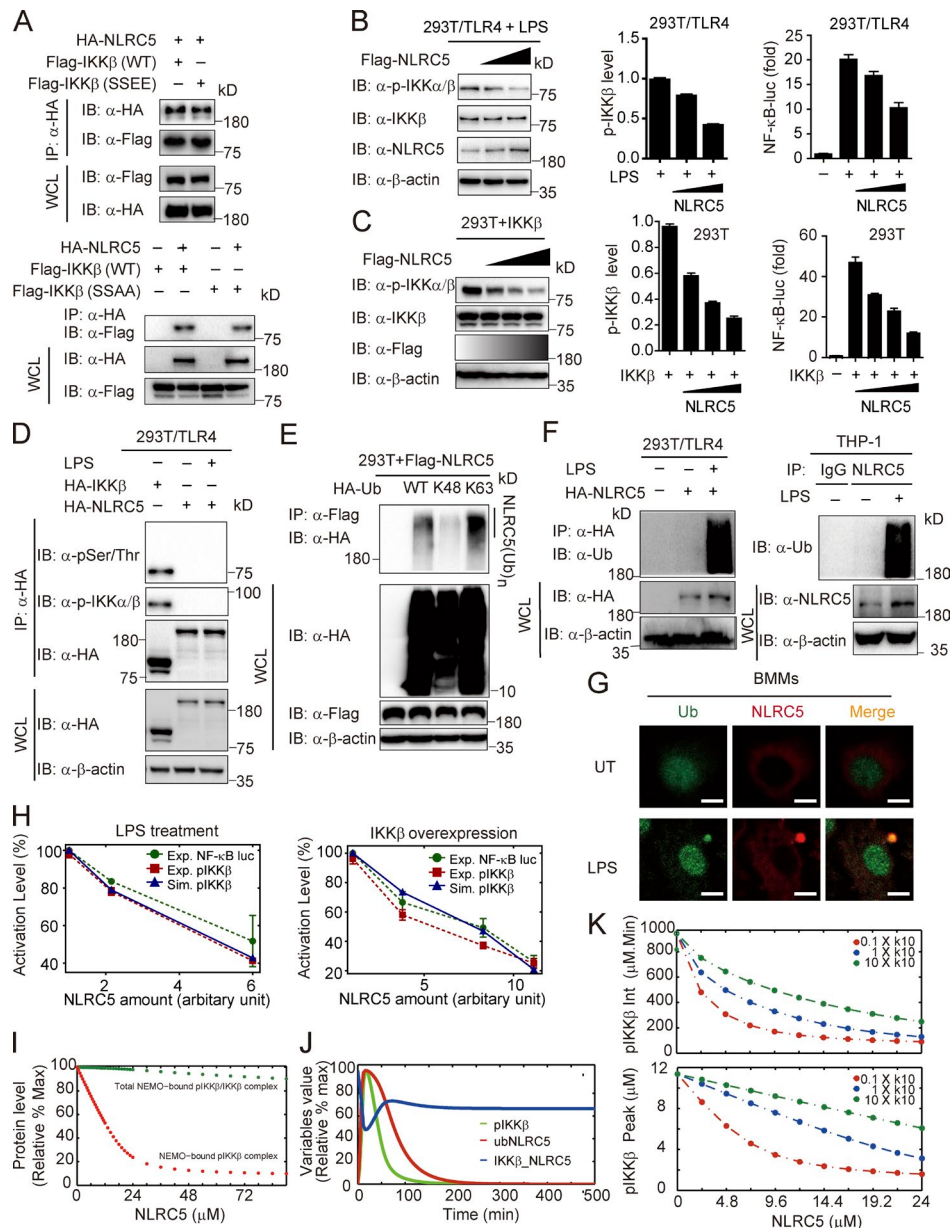

Figure S1. **NLRC5 ubiquitination is critical for its inhibitory function on NF-κB activation.** (A) HEK293T cells were transfected with HA-NLRC5, Flag-IKKβ (WT), and Flag-IKKβ (SSEE; top) or IKKβ (SSAA; bottom). Cell lysates were immunoprecipitated with anti-HA beads and detected with the indicated antibodies by immunoblot analysis. (B and C) HEK293T/TLR4 or HEK293T cells were transfected with increasing amounts of HA-NLRC5, followed by LPS treatment (B) or IKKβ overexpression (C), respectively. The lysates were used to analyze the pIKKβ by immunoblot analysis (left). The relative protein levels of pIKKβ were quantified by density scanning (middle). HEK293T/TLR4 or HEK293T cells were transfected with NLRC5, followed by LPS treatment (B) or IKKβ overexpression (C), respectively. The cell lysates were analyzed for NF-κB-dependent luciferase activity (right). Data are representative of three independent experiments.  $n = 3$ . Error bars indicate the SEM. (D) HEK293T/TLR4 cells transfected with HA-NLRC5 and HA-IKKβ were treated with LPS. Cell lysates were immunoprecipitated with anti-HA beads and immunoblotted with the indicated antibodies. (E) HEK293T/TLR4 cells transfected with Flag-NLRC5 and WT HA-Ub, HA-K48-Ub, or HA-K63-Ub were treated with LPS. Cell lysates were immunoprecipitated with anti-Flag beads and immunoblotted with the indicated antibodies. (F) HEK293T/TLR4 and THP-1 cells were treated with 200 ng/ml LPS for 2 h. Cell lysates were preboiled with 1% SDS before incubation in lysis buffer containing the anti-HA affinity gel (Sigma-Aldrich) or NLRC5 antibody with protein A/G agarose overnight. (G) Fluorescence microscopy of NLRC5 (red) and Ub (green) in BMMs with or without LPS stimulation. Bars, 10  $\mu\text{m}$ . (H) Comparison of experimental data, three independent experiments;  $n = 3$ . Error bars indicate the SEM (B and C) and simulation results of pIKKβ level by model II. (I) Simulation results of total NEMO-IKKβ complex (green; NEMO-IKKβ + NEMO-pIKKβ) and NEMO-pIKKβ (red) with different levels of NLRC5 by model II. (J) Temporal simulation for pIKKβ (green), ubiquitinated NLRC5 (red), and IKKβ-NLRC5 complex (blue) in model II. (K) The integrated and peaked value of pIKKβ with increasing amounts of NLRC5 under different ubiquitination conditions (i.e.,  $0.1 \times k10$ ,  $1 \times k10$ , and  $10 \times k10$ ;  $k10 = 5.91 \times 10^{-1} \text{ min}^{-1}$ ). The parameter  $k10$  quantifies the ubiquitination rate of NLRC5. IB, immunoblotting; IP, immunoprecipitation; UT, untreated; WCL, whole cell lysate.

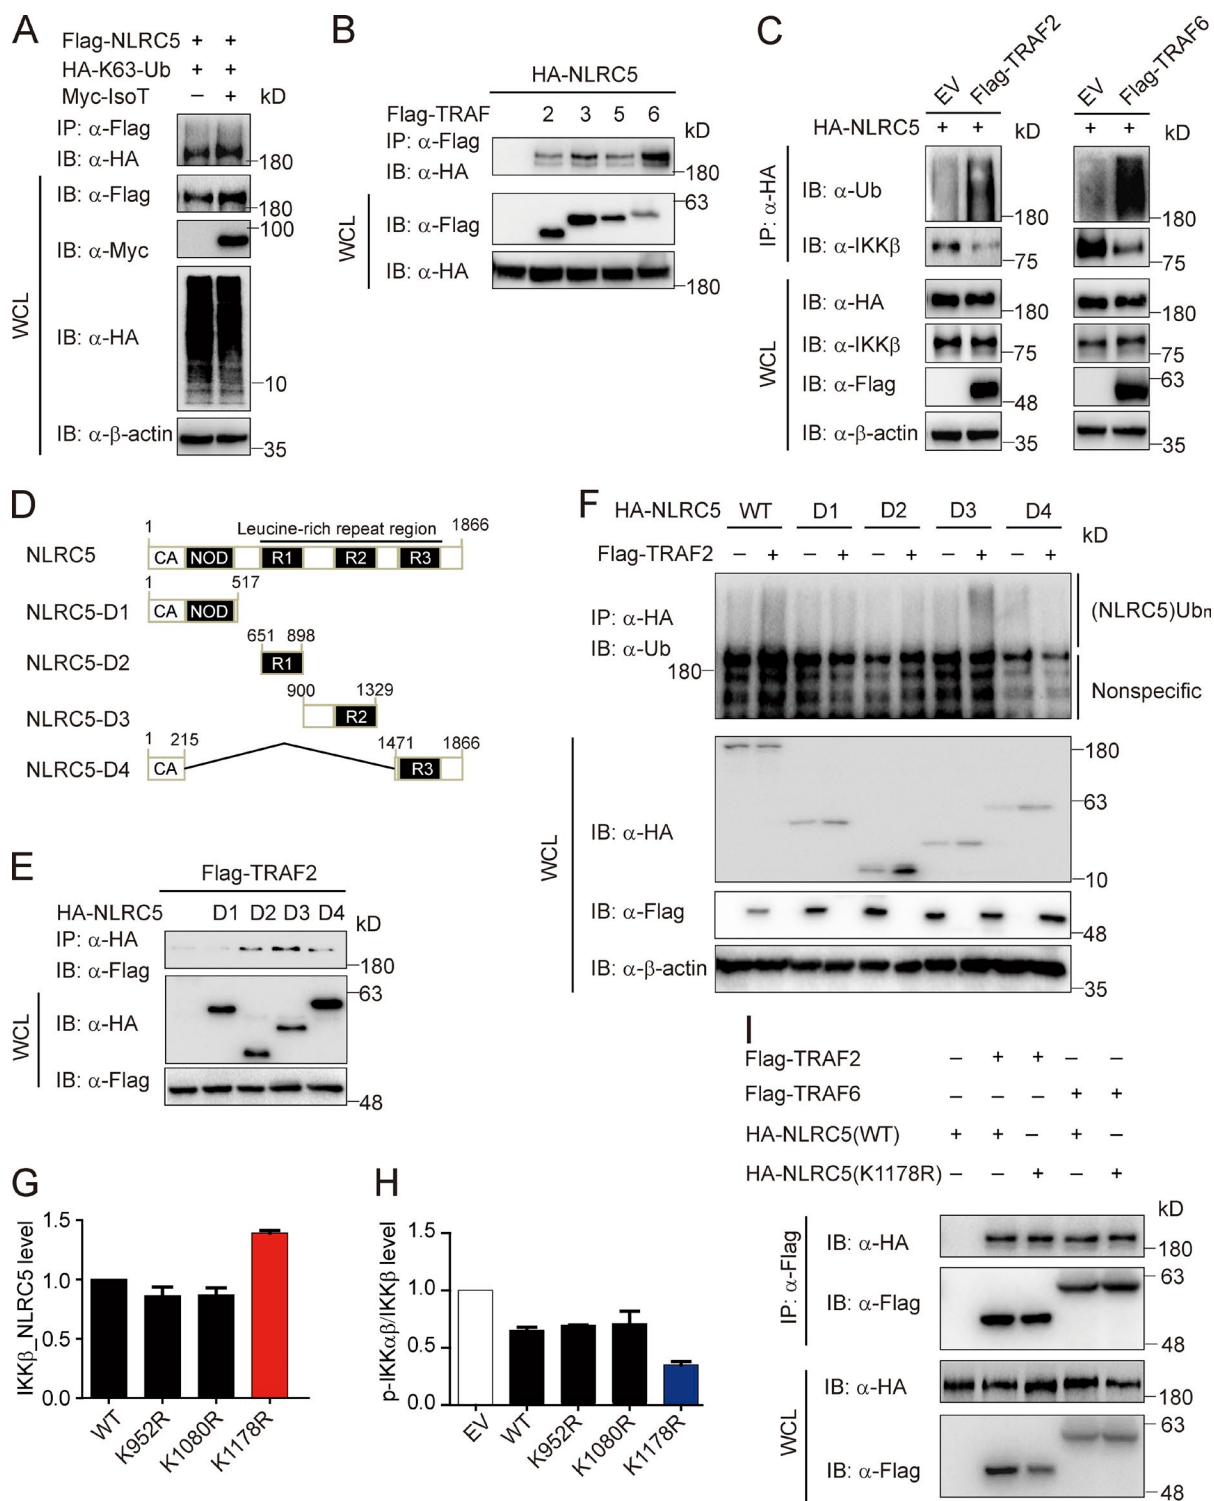

**Figure S2. TRAF2 and TRAF6 mediate the ubiquitination of NLRC5 on its functional domain.** (A) HEK293T cells were transfected with *Flag-NLRC5* and *HA-K63-Ub* with or without *Myc-IsoT*. Cell lysates were immunoprecipitated with anti-Flag beads and immunoblotted with the indicated antibodies. (B) HEK293T cells were transfected with *HA-NLRC5*, *Flag-TRAF2*, *Flag-TRAF3*, *Flag-TRAF5*, or *Flag-TRAF6*. Cell lysates were immunoprecipitated with anti-Flag beads followed by immunoblot analysis with the indicated antibodies. (C) HEK293T cells were transfected with plasmids encoding *HA-NLRC5*, *EV*, *Flag-TRAF2* (left), or *Flag-TRAF6* (right). Cell lysates were immunoprecipitated with anti-HA beads and immunoblotted with the indicated antibodies. (D) Various constructs of NLRC5 domains. (E) HEK293T cells were transfected with *HA-NLRC5-D1*, *HA-NLRC5-D2*, *HA-NLRC5-D3*, *HA-NLRC5-D4*, or *Flag-TRAF2*. Cell lysates were immunoprecipitated with anti-HA beads, and immunoblotting was performed with the indicated antibodies. (F) HEK293T cells were transfected with *HA-NLRC5*, *HA-NLRC5-D1*, *HA-NLRC5-D2*, *HA-NLRC5-D3*, *HA-NLRC5-D4*, and *Flag-TRAF2* or *EV* (-). Cell lysates were immunoprecipitated with anti-HA beads and immunoblotted with anti-Ub antibody. (G and H) Quantitative comparison of IKK $\beta$ -NLRC5 (G) or pIKK (H) level by density scanning of the blots in Fig. 3 F. Data are representative of three independent experiments.  $n = 3$ . Error bars indicate the SEM. (I) HEK293T cells were transfected with *HA-NLRC5(WT)*, *HA-NLRC5(K1178R)*, *Flag-TRAF2*, or *Flag-TRAF6*. Cell lysates were immunoprecipitated with anti-Flag beads and immunoblotted with anti-HA antibody. IB, immunoblotting; IP, immunoprecipitation; Ub, Ub chain; WCL, whole cell lysate.

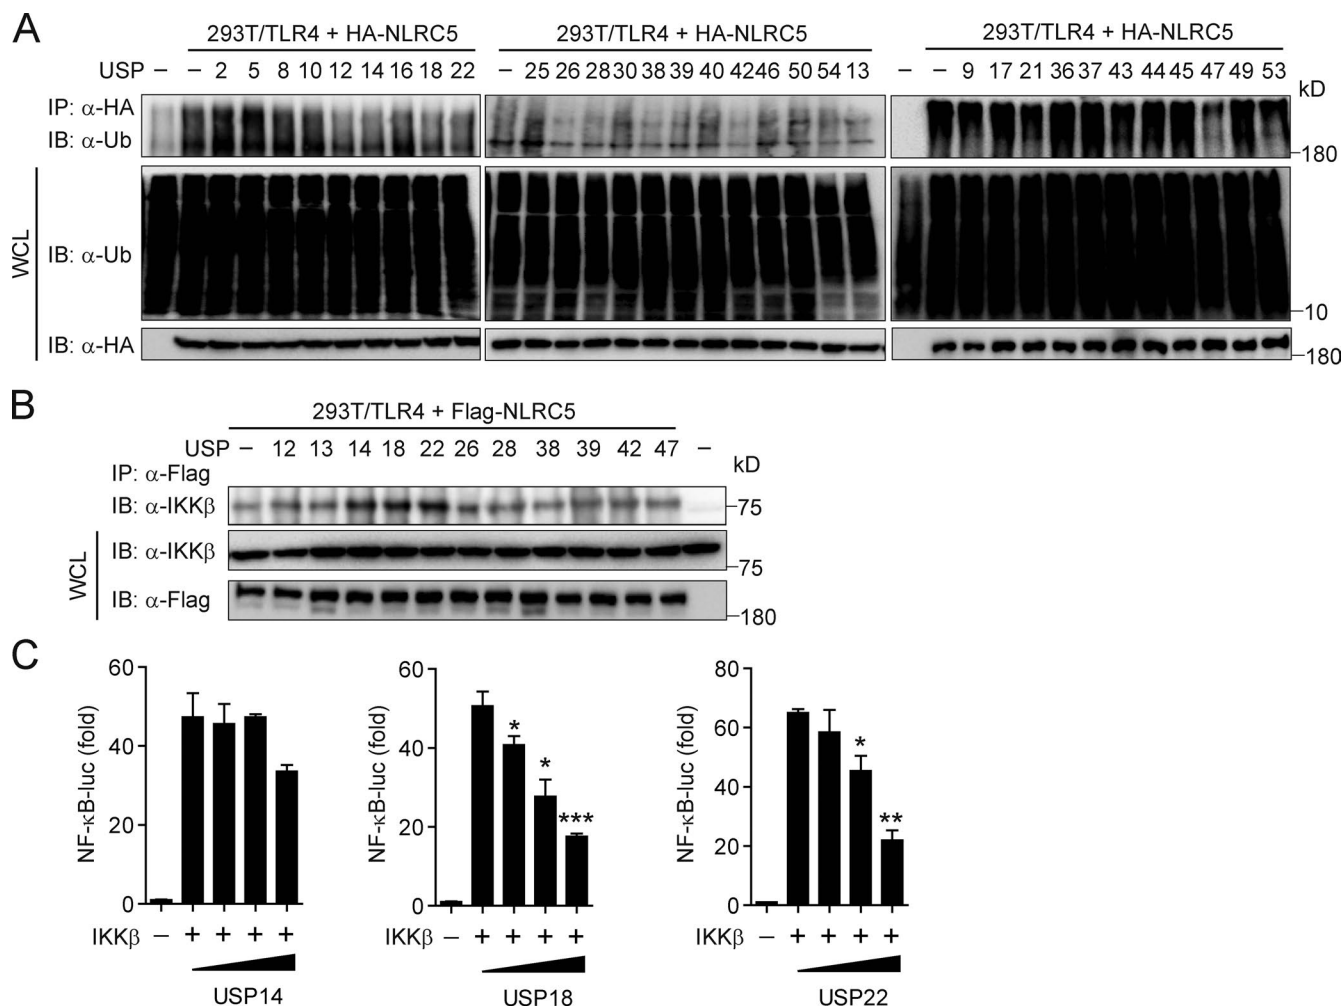

Figure S3. **Identification of NLRC5-specific DUBs.** (A) HEK293T/TLR4 cells were transfected with *HA-NLRC5* and EV (–) or the indicated *USP* plasmids, followed by LPS treatment for 30 min. Cell lysates were immunoprecipitated with anti-HA beads and immunoblotted with anti-Ub antibody. (B) HEK293T/TLR4 cells were transfected with *Flag-NLRC5* and EV (–) or *USP* family plasmids, followed by LPS treatment for 30 min. Cell lysates were immunoprecipitated with anti-Flag beads and immunoblotted with anti-IKK $\beta$  antibody. (C) HEK293T cells were transfected with *NF- $\kappa$ B-luc* and *pRL-TK-luc* reporters, the plasmids encoding *IKK- $\beta$* , increasing amounts of *Myc-USP14* (left), *Myc-USP18* (middle), or *Myc-USP22* (right), and analyzed for NF- $\kappa$ B-dependent luciferase activity. Data are representative of three independent experiments.  $n = 3$ . Error bars indicate the SEM. \*,  $P < 0.05$ ; \*\*,  $P < 0.01$ ; \*\*\*,  $P < 0.001$  versus the cells with IKK- $\beta$  overexpression alone (two-tailed Student's  $t$  test). IB, immunoblotting; IP, immunoprecipitation; WCL, whole cell lysate.

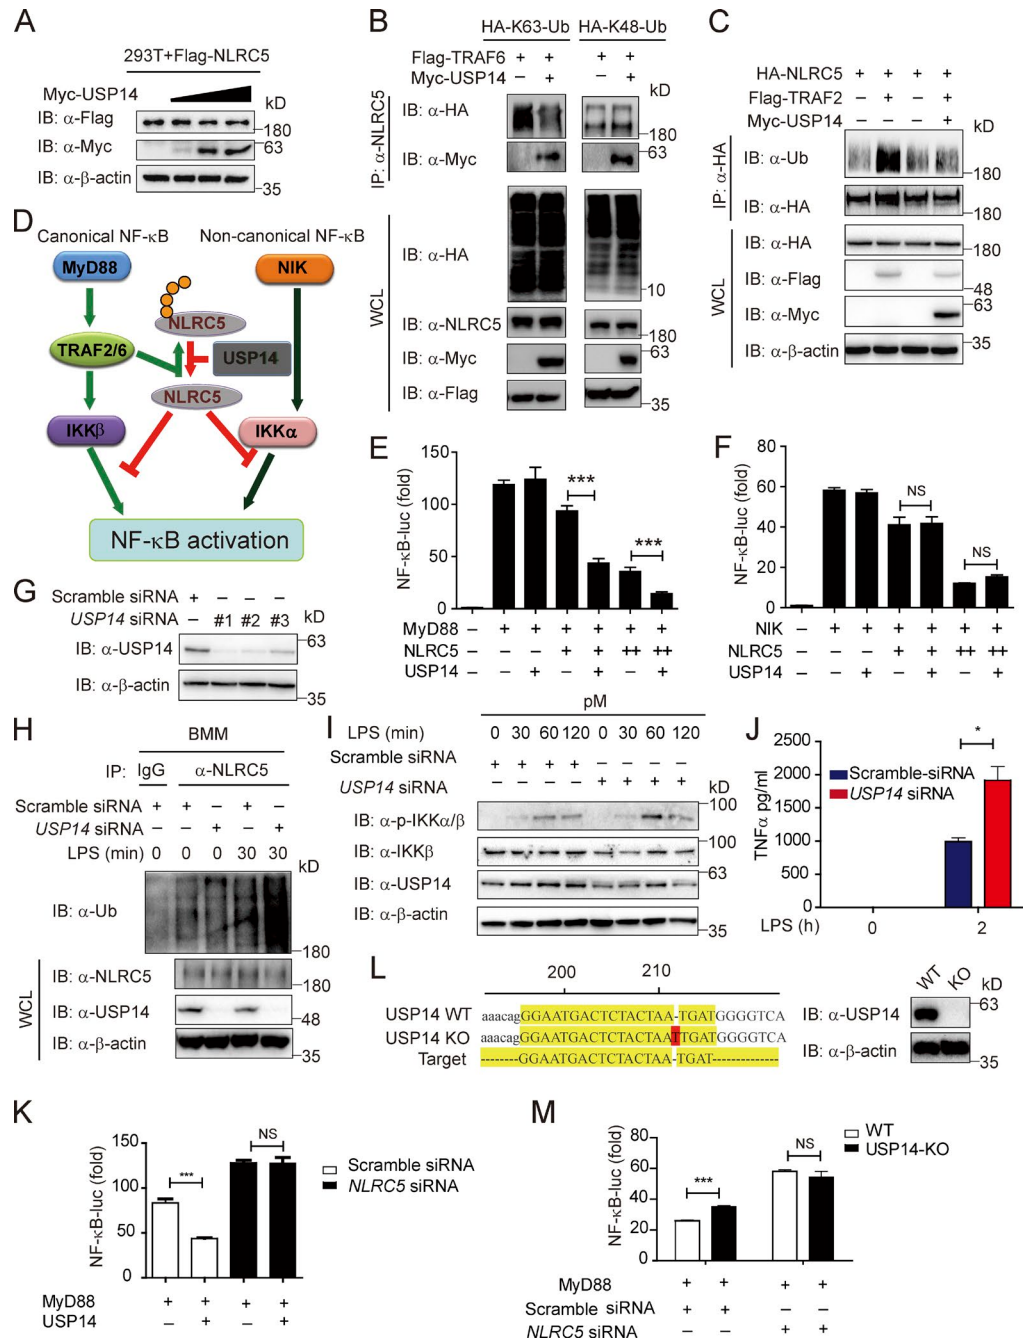

**Figure S4. USP14 deubiquitinates NLRC5 and enhances NLRC5 inhibition of NF- $\kappa$ B signaling.** (A) HEK293T cells were transfected with plasmids encoding *Flag-NLRC5* and increasing amount of *Myc-USP14*, followed by immunoblot analysis with the indicated antibodies. (B) HEK293T cells were transfected with plasmids encoding *Flag-TRAF6*, *Myc-USP14*, and *HA-K63-Ub* (left) or *HA-K48-Ub* (right). Cell lysates were immunoprecipitated with anti-NLRC5 antibody and immunoblotted with the indicated antibodies. (C) HEK293T cells were transfected with plasmids encoding *HA-NLRC5* or *Flag-TRAF2* with or without *Myc-USP14*. Cell lysates were immunoprecipitated with anti-HA beads and immunoblotted with the indicated antibodies. (D) A schematic representation of canonical and noncanonical NF- $\kappa$ B signaling pathway regulated by NLRC5 and USP14. (E and F) HEK293T cells were transfected with plasmids encoding *MyD88* (E) or *NIK* (F) and the other plasmids with the indicated combinations. Cell lysates were analyzed for NF- $\kappa$ B-dependent luciferase activity. \*\*\*,  $P < 0.001$  versus the cells with *MyD88* and *NLRC5* overexpression (two-tailed Student's  $t$  test). (G) HEK293T cells were transfected with *USP14* siRNAs or control siRNA, and cell lysates were immunoblotted with the anti-USP14 antibody. (H) BMMs were transfected with scrambled siRNA or mouse *USP14* siRNA, followed by LPS treatment at the indicated time points. Cell lysates were immunoprecipitated with anti-NLRC5 antibody and immunoblotted with anti-Ub antibody. (I and J) pMs were transfected with scrambled siRNA or mouse *USP14* siRNA, followed by LPS treatment at the indicated time points. Cell lysates were immunoblotted with the indicated antibodies (I). ELISA was performed to detect the level of TNF in cell supernatant (J). (K) HEK293T cells were transfected with *NLRC5* siRNAs or control siRNA, followed by the transfection of *MyD88*, *USP14*, and NF- $\kappa$ B-luc reporter plasmid and pRL-TK-luc reporter plasmid. The cell lysates were analyzed for NF- $\kappa$ B-dependent luciferase activity. (L) Characterization of *USP14* KO cells. The sequence (left) and immunoblot (right) of *USP14* in *USP14* KO cells were determined. Yellow highlighting indicates the target area of *USP14* guide RNA, and red highlighting indicates the insertion mutation of the *USP14* gene. (M) WT or *USP14* KO HEK293T cells were transfected with *NLRC5* siRNAs or control siRNA, followed by the transfection of *MyD88* and NF- $\kappa$ B-luc reporter plasmid or pRL-TK-luc reporter plasmids. The cell lysates were analyzed for NF- $\kappa$ B-dependent luciferase activity. \*,  $P < 0.05$ ; \*\*\*,  $P < 0.001$  versus the cells transfected with control siRNAs (two-tailed Student's  $t$  test). Data in E, F, J, K, and M are representative of at least three independent experiments.  $n = 3$ . Error bars indicate the SEM. IB, immunoblotting; IP, immunoprecipitation; WCL, whole cell lysate.

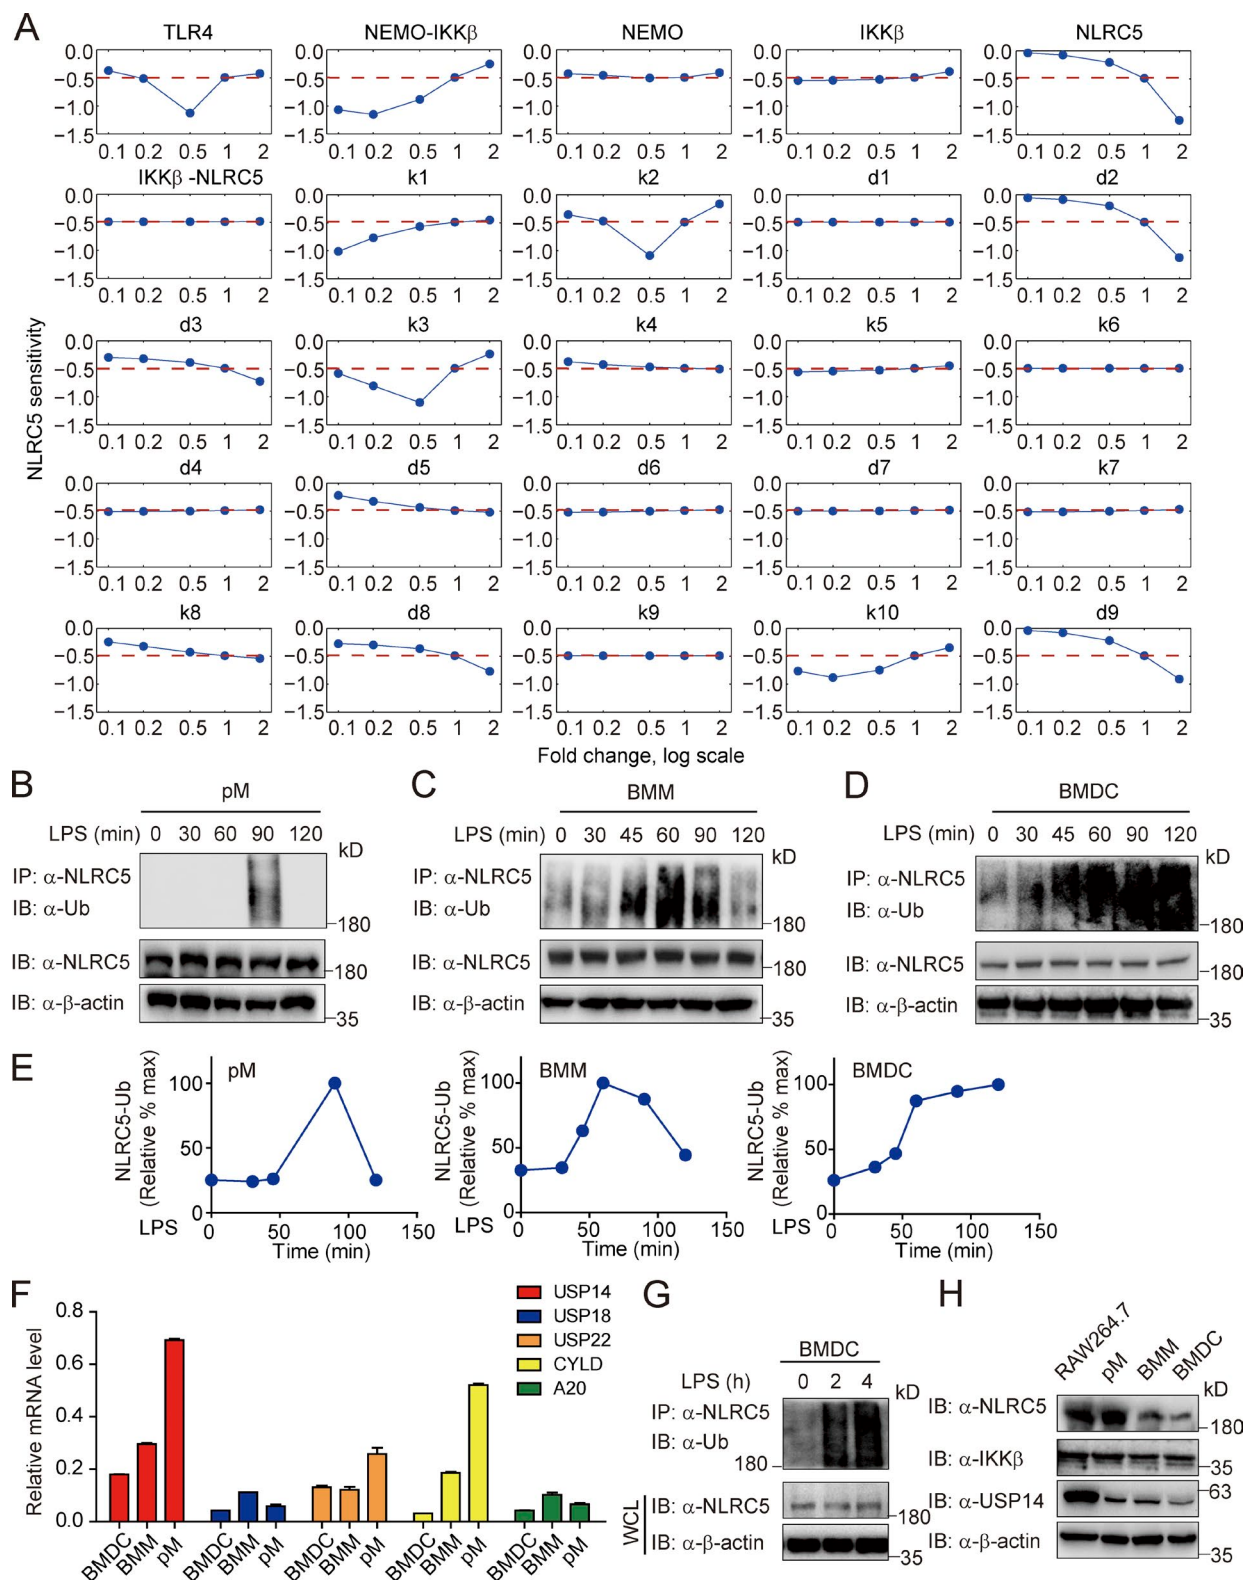

**Figure S5. NLRC5 and USP14 levels determine the NLRC5 sensitivity on NF- $\kappa$ B activation in different cell types.** (A) Local sensitivity coefficients for NLRC5 on IKK activity under varying parameters or initial nonzero conditions. Dotted red lines indicate the NLRC5 sensitivity for pIKK- $\beta$  with no perturbation of the parameter set. (B–D) The ubiquitination level of NLRC5 with LPS stimulation at the indicated time points from pMs (B), BMMs (C), and BMDCs (D). (E) The quantified ubiquitination level of NLRC5 in pMs, BMMs, or BMDCs. The ubiquitination level of NLRC5 was normalized by the maximum. (F) mRNA levels of indicated DUBs and NLRC5 in pMs, BMMs, and BMDCs. Data are representative of three independent experiments.  $n = 3$ . Error bars indicate the SEM. (G) The ubiquitination levels of NLRC5 upon LPS stimulation at the indicated time points from BMDCs. (H) The protein levels of NLRC5, IKK- $\beta$ , and USP14 from pMs, BMDCs, BMMs, or RAW264.7 cells. IB, immunoblotting; IP, immunoprecipitation; WCL, whole cell lysate.

Table S1. Reactions and rates are shown

| Reactions                                                | Reaction rates                                           | Abbreviation |
|----------------------------------------------------------|----------------------------------------------------------|--------------|
| <b>Ligand binding</b>                                    |                                                          |              |
| TLR4 + LPS → TLR4-LPS                                    | $k_1[\text{TLR4}][\text{LPS}]$                           | V1           |
| TLR4-LPS → S + TLR4-LPS                                  | $k_2[\text{TLR4-LPS}]$                                   | V2           |
| TLR4-LPS → TLR4 + LPS                                    | $d_1[\text{TLR4-LPS}]$                                   | V3           |
| TLR4-LPS → null                                          | $d_2[\text{TLR4-LPS}]$                                   | V4           |
| S → null                                                 | $d_3[\text{S}]$                                          | V5           |
| <b>IKK-β activation</b>                                  |                                                          |              |
| NEMO-IKK-β + S → NEMO-pIKK-β + S                         | $k_3[\text{NEMO-IKK-}\beta][\text{S}]$                   | V6           |
| NEMO-IKK-β → NEMO + IKK-β                                | $d_4[\text{NEMO-IKK-}\beta]$                             | V7           |
| NEMO + IKK-β → NEMO-IKK-β                                | $k_4[\text{NEMO}][\text{IKK-}\beta]$                     | V8           |
| NEMO-pIKK-β → NEMO + pIKK-β <sup>free</sup>              | $d_5[\text{NEMO-pIKK-}\beta]$                            | V9           |
| NEMO + pIKK-β <sup>free</sup> → NEMO-pIKK-β              | $k_5[\text{NEMO}][\text{pIKK-}\beta^{\text{free}}]$      | V10          |
| pIKK-β <sup>free</sup> + IKK-β → 2pIKK-β <sup>free</sup> | $k_6[\text{pIKK-}\beta^{\text{free}}][\text{IKK-}\beta]$ | V11          |
| NEMO-pIKK-β → NEMO-IKK-β                                 | $d_6[\text{NEMO-pIKK-}\beta]$                            | V12          |
| pIKK-β <sup>free</sup> → IKK-β                           | $d_7[\text{pIKK-}\beta^{\text{free}}]$                   | V13          |
| <b>NLRC5 regulation</b>                                  |                                                          |              |
| IKK-β + NLRC5 → IKK-β-NLRC5                              | $k_7[\text{NLRC5}][\text{IKK-}\beta]$                    | V14          |
| pIKK-β <sup>free</sup> + NLRC5 → IKK-β-NLRC5             | $k_8[\text{pIKK-}\beta^{\text{free}}][\text{NLRC5}]$     | V15          |
| IKK-β-NLRC5 → IKK-β + NLRC5                              | $d_8[\text{IKK-}\beta\text{-NLRC5}]$                     | V16          |
| <b>NLRC5 ubiquitination (adding in model II)</b>         |                                                          |              |
| NLRC5 + S → ubNLRC5 + S                                  | $k_9[\text{NLRC5}][\text{S}]$                            | V17          |
| IKK-β-NLRC5 + S → ubNLRC5 + S + IKK-β                    | $k_{10}[\text{IKK-}\beta\text{-NLRC5}][\text{S}]$        | V18          |
| ubNLRC5 → NLRC5                                          | $d_9[\text{ubNLRC5}]$                                    | V19          |

Table S2. Parameters for the WT model I and model II

| Symbols       | Description                                                 | Values <sup>a</sup>   |                       | References             |
|---------------|-------------------------------------------------------------|-----------------------|-----------------------|------------------------|
|               |                                                             | Model I               | Model II              |                        |
| [TLR4]        | Initial concentration of TLR4                               | 2.45                  | 2.15                  | Fitted                 |
| [LPS]         | Initial concentration of LPS                                | 2.00                  | 2.00                  | Rivière et al., 2009   |
| [NEMO-IKK-β]  | Initial concentration of NEMO-IKK-β                         | $1.78 \times 10^1$    | $1.49 \times 10^1$    | Fitted                 |
| [NEMO]        | Initial concentration of NEMO                               | 2.31                  | 6.68                  | Fitted                 |
| [IKK-β]       | Initial concentration of IKK-β                              | 2.34                  | 4.33                  | Fitted                 |
| [NLRC5]       | Initial concentration of NLRC5                              | 8.99                  | 9.21                  | Fitted                 |
| [IKK-β-NLRC5] | Initial concentration of IKK-β-NLRC5                        | 2.40                  | 2.35                  | Fitted                 |
| [USP14]       | Initial concentration of USP14                              | –                     | 24                    | Estimated              |
| k1            | Association rate of TLR4 and LPS                            | $3.3 \times 10^{-1}$  | $3.3 \times 10^{-1}$  | Shin et al., 2007      |
| d1            | Dissociation rate of TLR4-LPS                               | $1.0 \times 10^{-7}$  | $1.0 \times 10^{-7}$  | Shin et al., 2007      |
| d2            | TLR4-LPS degradation rate                                   | $2.0 \times 10^{-1}$  | $2.0 \times 10^{-1}$  | Rivière et al., 2009   |
| k2            | S production rate                                           | $2.96 \times 10^{-1}$ | $5.26 \times 10^{-1}$ | Fitted                 |
| d3            | S degradation rate                                          | $2.66 \times 10^{-2}$ | $2.42 \times 10^{-2}$ | Fitted                 |
| k3            | S-mediated phosphorylation of NEMO-IKK-β                    | $3.29 \times 10^{-1}$ | $1.66 \times 10^{-1}$ | Fitted                 |
| k4            | Association rate of NEMO and IKK-β                          | $4.2 \times 10^2$     | $4.2 \times 10^2$     | Lo et al., 2008        |
| d4            | Dissociation rate of NEMO-IKK-β                             | 1.5                   | 1.5                   | Lo et al., 2008        |
| k5            | Association rate of NEMO and pIKK-β <sup>free</sup>         | $4.40 \times 10^1$    | $2.20 \times 10^1$    | Fitted                 |
| d5            | Dissociation rate of NEMO-pIKK-β                            | 7.53                  | $1.25 \times 10^1$    | Fitted                 |
| k6            | Autophosphorylation of pIKK-β <sup>free</sup> rate constant | $1.41 \times 10^{-1}$ | $5.40 \times 10^{-1}$ | Fitted                 |
| d6            | Dephosphorylation of NEMO-pIKK-β                            | $7.37 \times 10^{-2}$ | $5.83 \times 10^{-1}$ | Fitted                 |
| d7            | Dephosphorylation of pIKK-β <sup>free</sup> rate constant   | $5.84 \times 10^{-1}$ | $3.48 \times 10^{-1}$ | Fitted                 |
| k7            | Association rate of NLRC5 and IKK-β                         | 1.34                  | 6.64                  | Fitted                 |
| k8            | Association rate of NLRC5 and pIKK-β <sup>free</sup>        | $6.62 \times 10^{-1}$ | 5.33                  | Fitted                 |
| d8            | Dissociation rate of IKK-β-NLRC5                            | 7.03                  | 1.89                  | Fitted                 |
| k9            | S-mediated ubiquitination of NLRC5 rate                     | –                     | $8.29 \times 10^{-4}$ | Fitted                 |
| k10           | S-mediated ubiquitination of IKK-β-NLRC5 rate               | –                     | $5.91 \times 10^{-1}$ | Fitted                 |
| d9            | Rate of ubNLRC5 deubiquitination                            | –                     | $2.43 \times 10^{-1}$ | Fitted                 |
| d9'           | Rate of ubNLRC5 deubiquitination for USP14                  | –                     | $1.01 \times 10^{-2}$ | Estimated <sup>b</sup> |

<sup>a</sup>The first and second order rate constants are expressed in units of  $\text{min}^{-1}$  and  $\mu\text{M}^{-1}\cdot\text{min}^{-1}$ , respectively. Initial conditions were in units of  $\mu\text{M}$ . Other initial conditions were set to zero.

<sup>b</sup>The parameter d9' was calculated by simply dividing d9 by [USP14]. [USP14] only occurs in Fig. 7.

## References

- Lo, Y.C., U. Maddineni, J.Y. Chung, R.L. Rich, D.G. Myszka, and H. Wu. 2008. High-affinity interaction between IKK $\beta$  and NEMO. *Biochemistry*. 47:3109–3116. <http://dx.doi.org/10.1021/bi702312c>
- Rivière, B., Y. Epshteyn, D. Swigon, and Y. Vodovotz. 2009. A simple mathematical model of signaling resulting from the binding of lipopolysaccharide with Toll-like receptor 4 demonstrates inherent preconditioning behavior. *Math. Biosci.* 217:19–26. <http://dx.doi.org/10.1016/j.mbs.2008.10.002>
- Shin, H.J., H. Lee, J.D. Park, H.C. Hyun, H.O. Sohn, D.W. Lee, and Y.S. Kim. 2007. Kinetics of binding of LPS to recombinant CD14, TLR4, and MD-2 proteins. *Mol. Cells*. 24:119–124.
